# Supplementary material
Source: HighWire-hosted journal article supplement (https://erj.ersjournals.com/content/52/5/1801182)

Figure S1

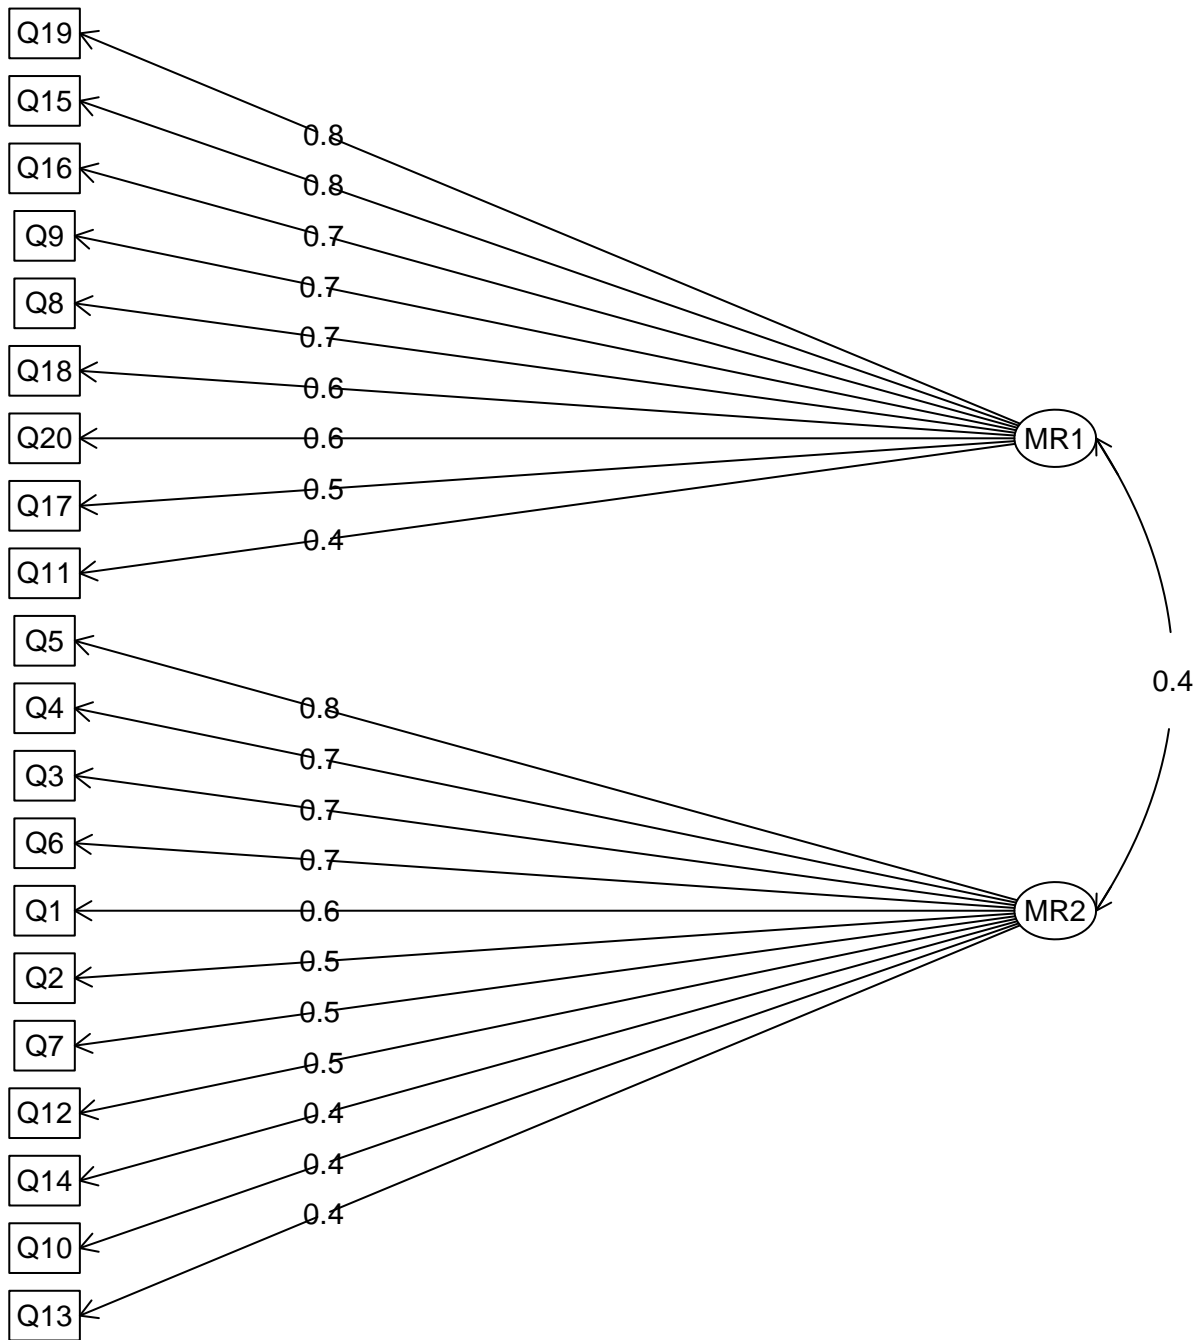

Figure S2 Panel A

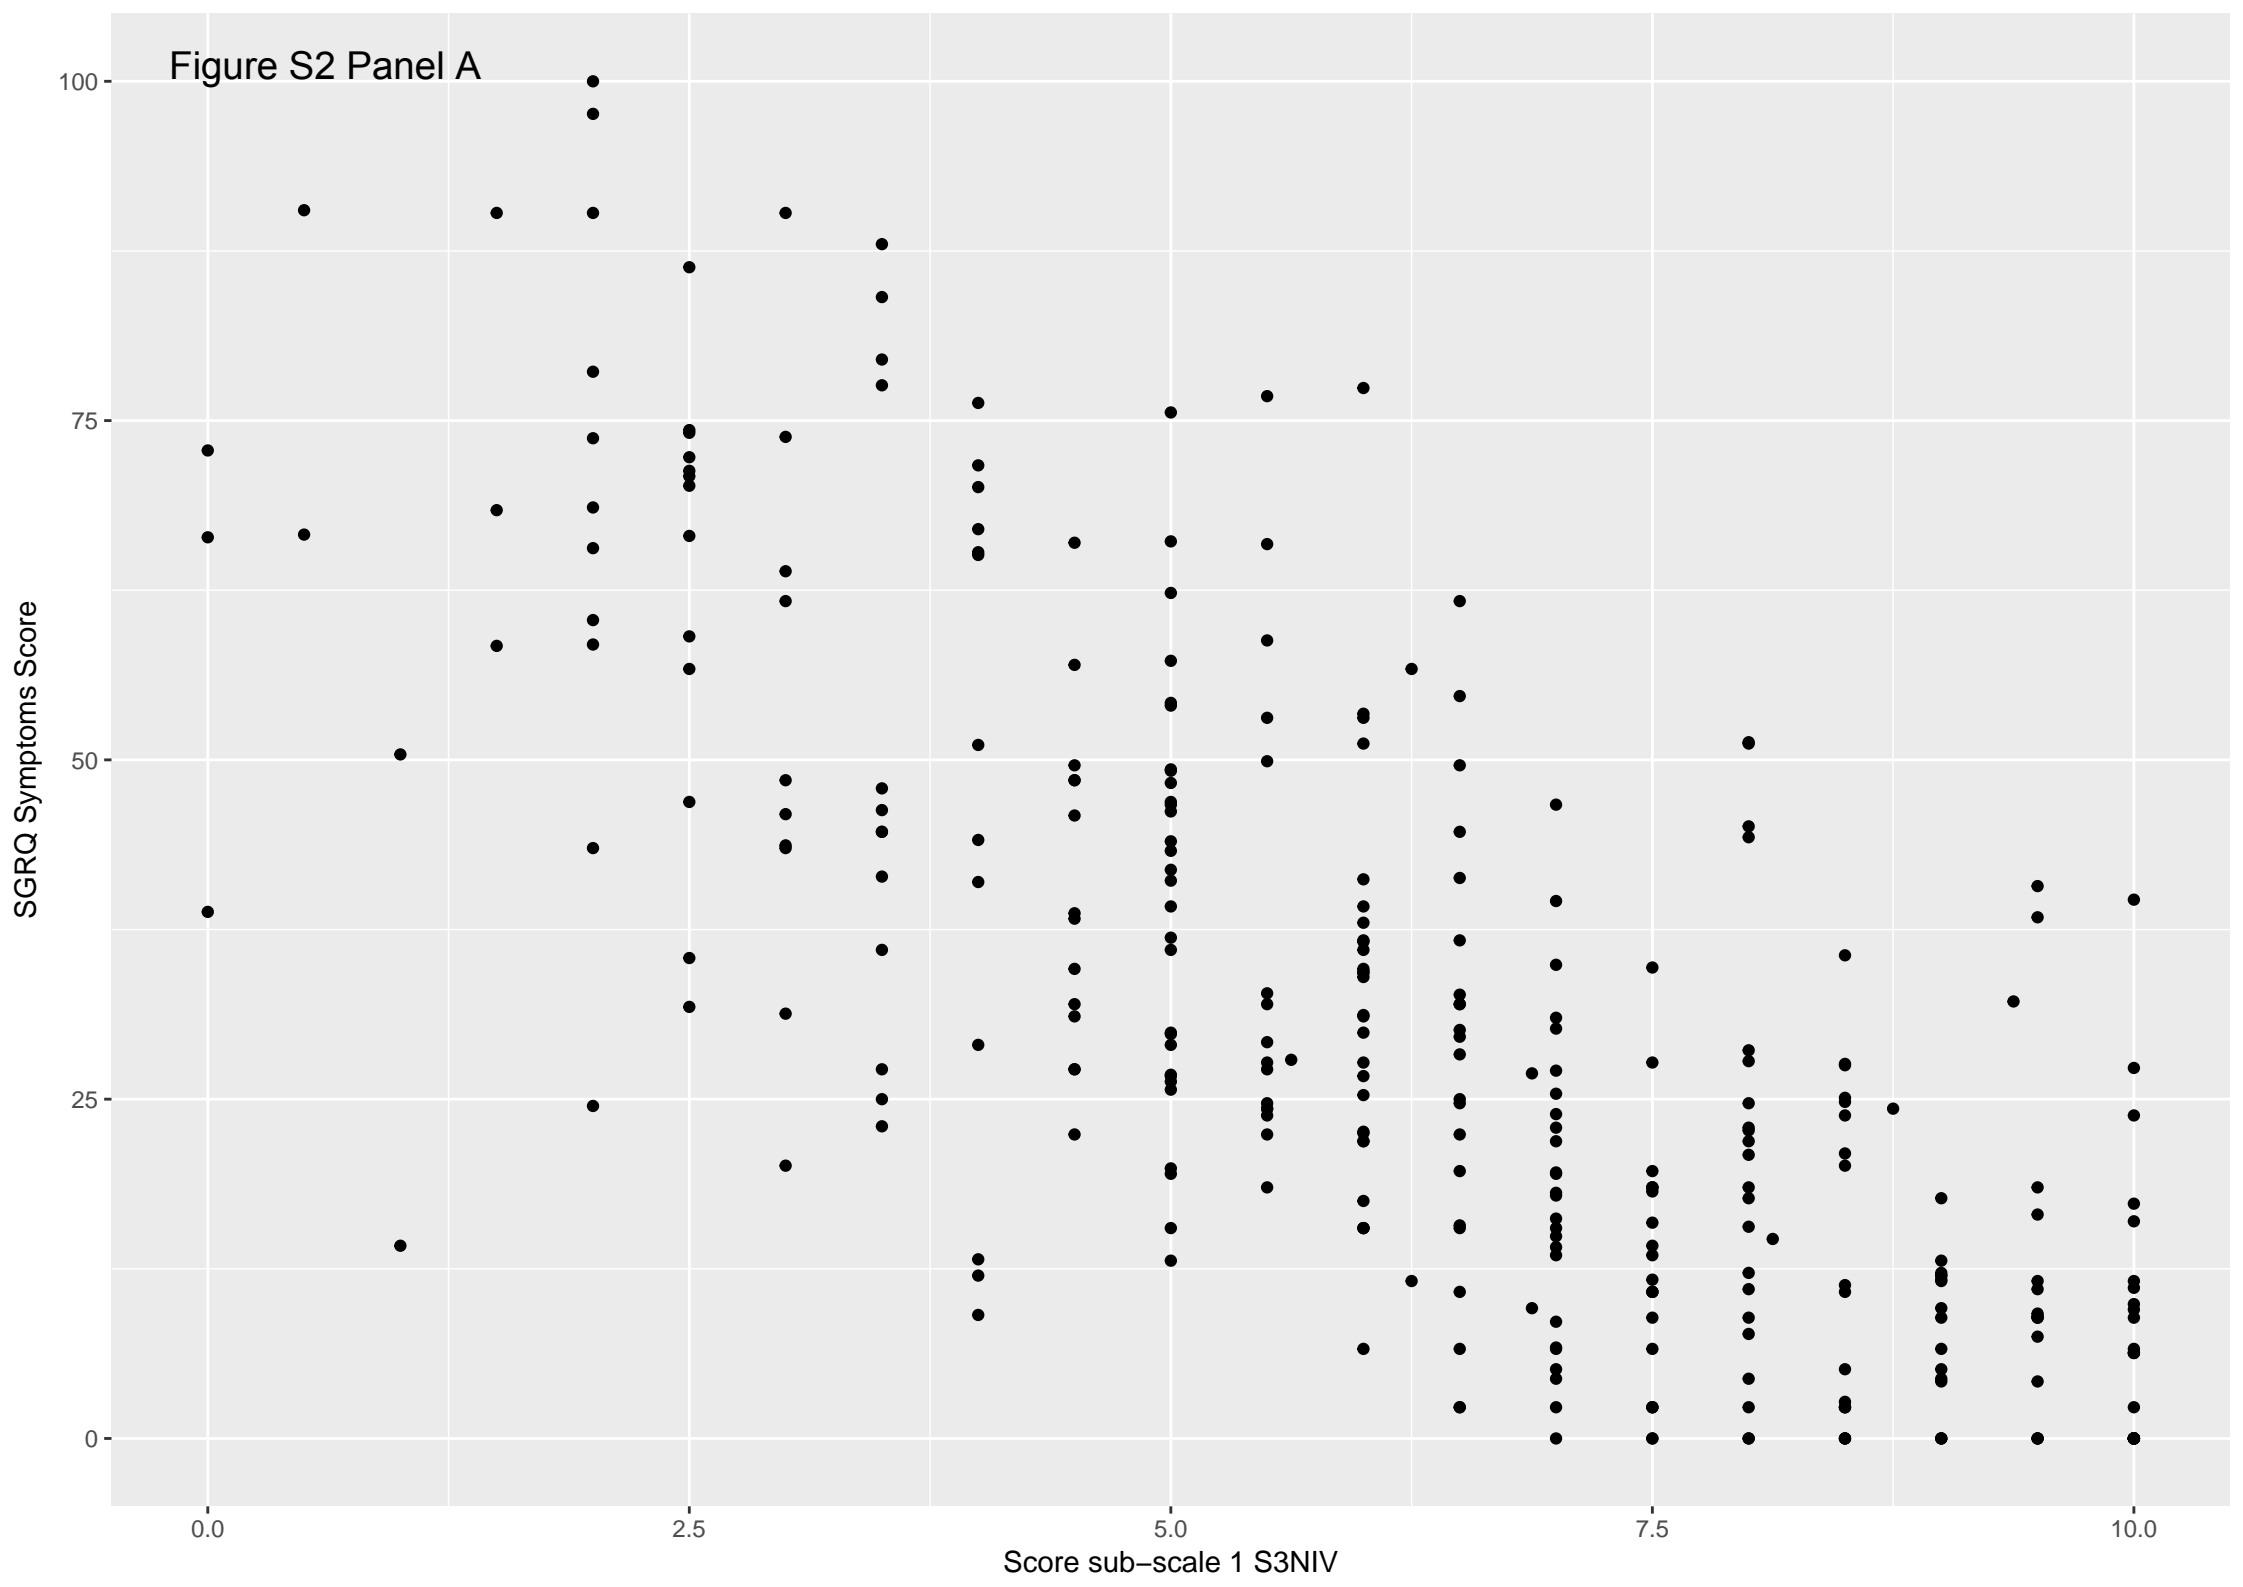

Figure S2 Panel B

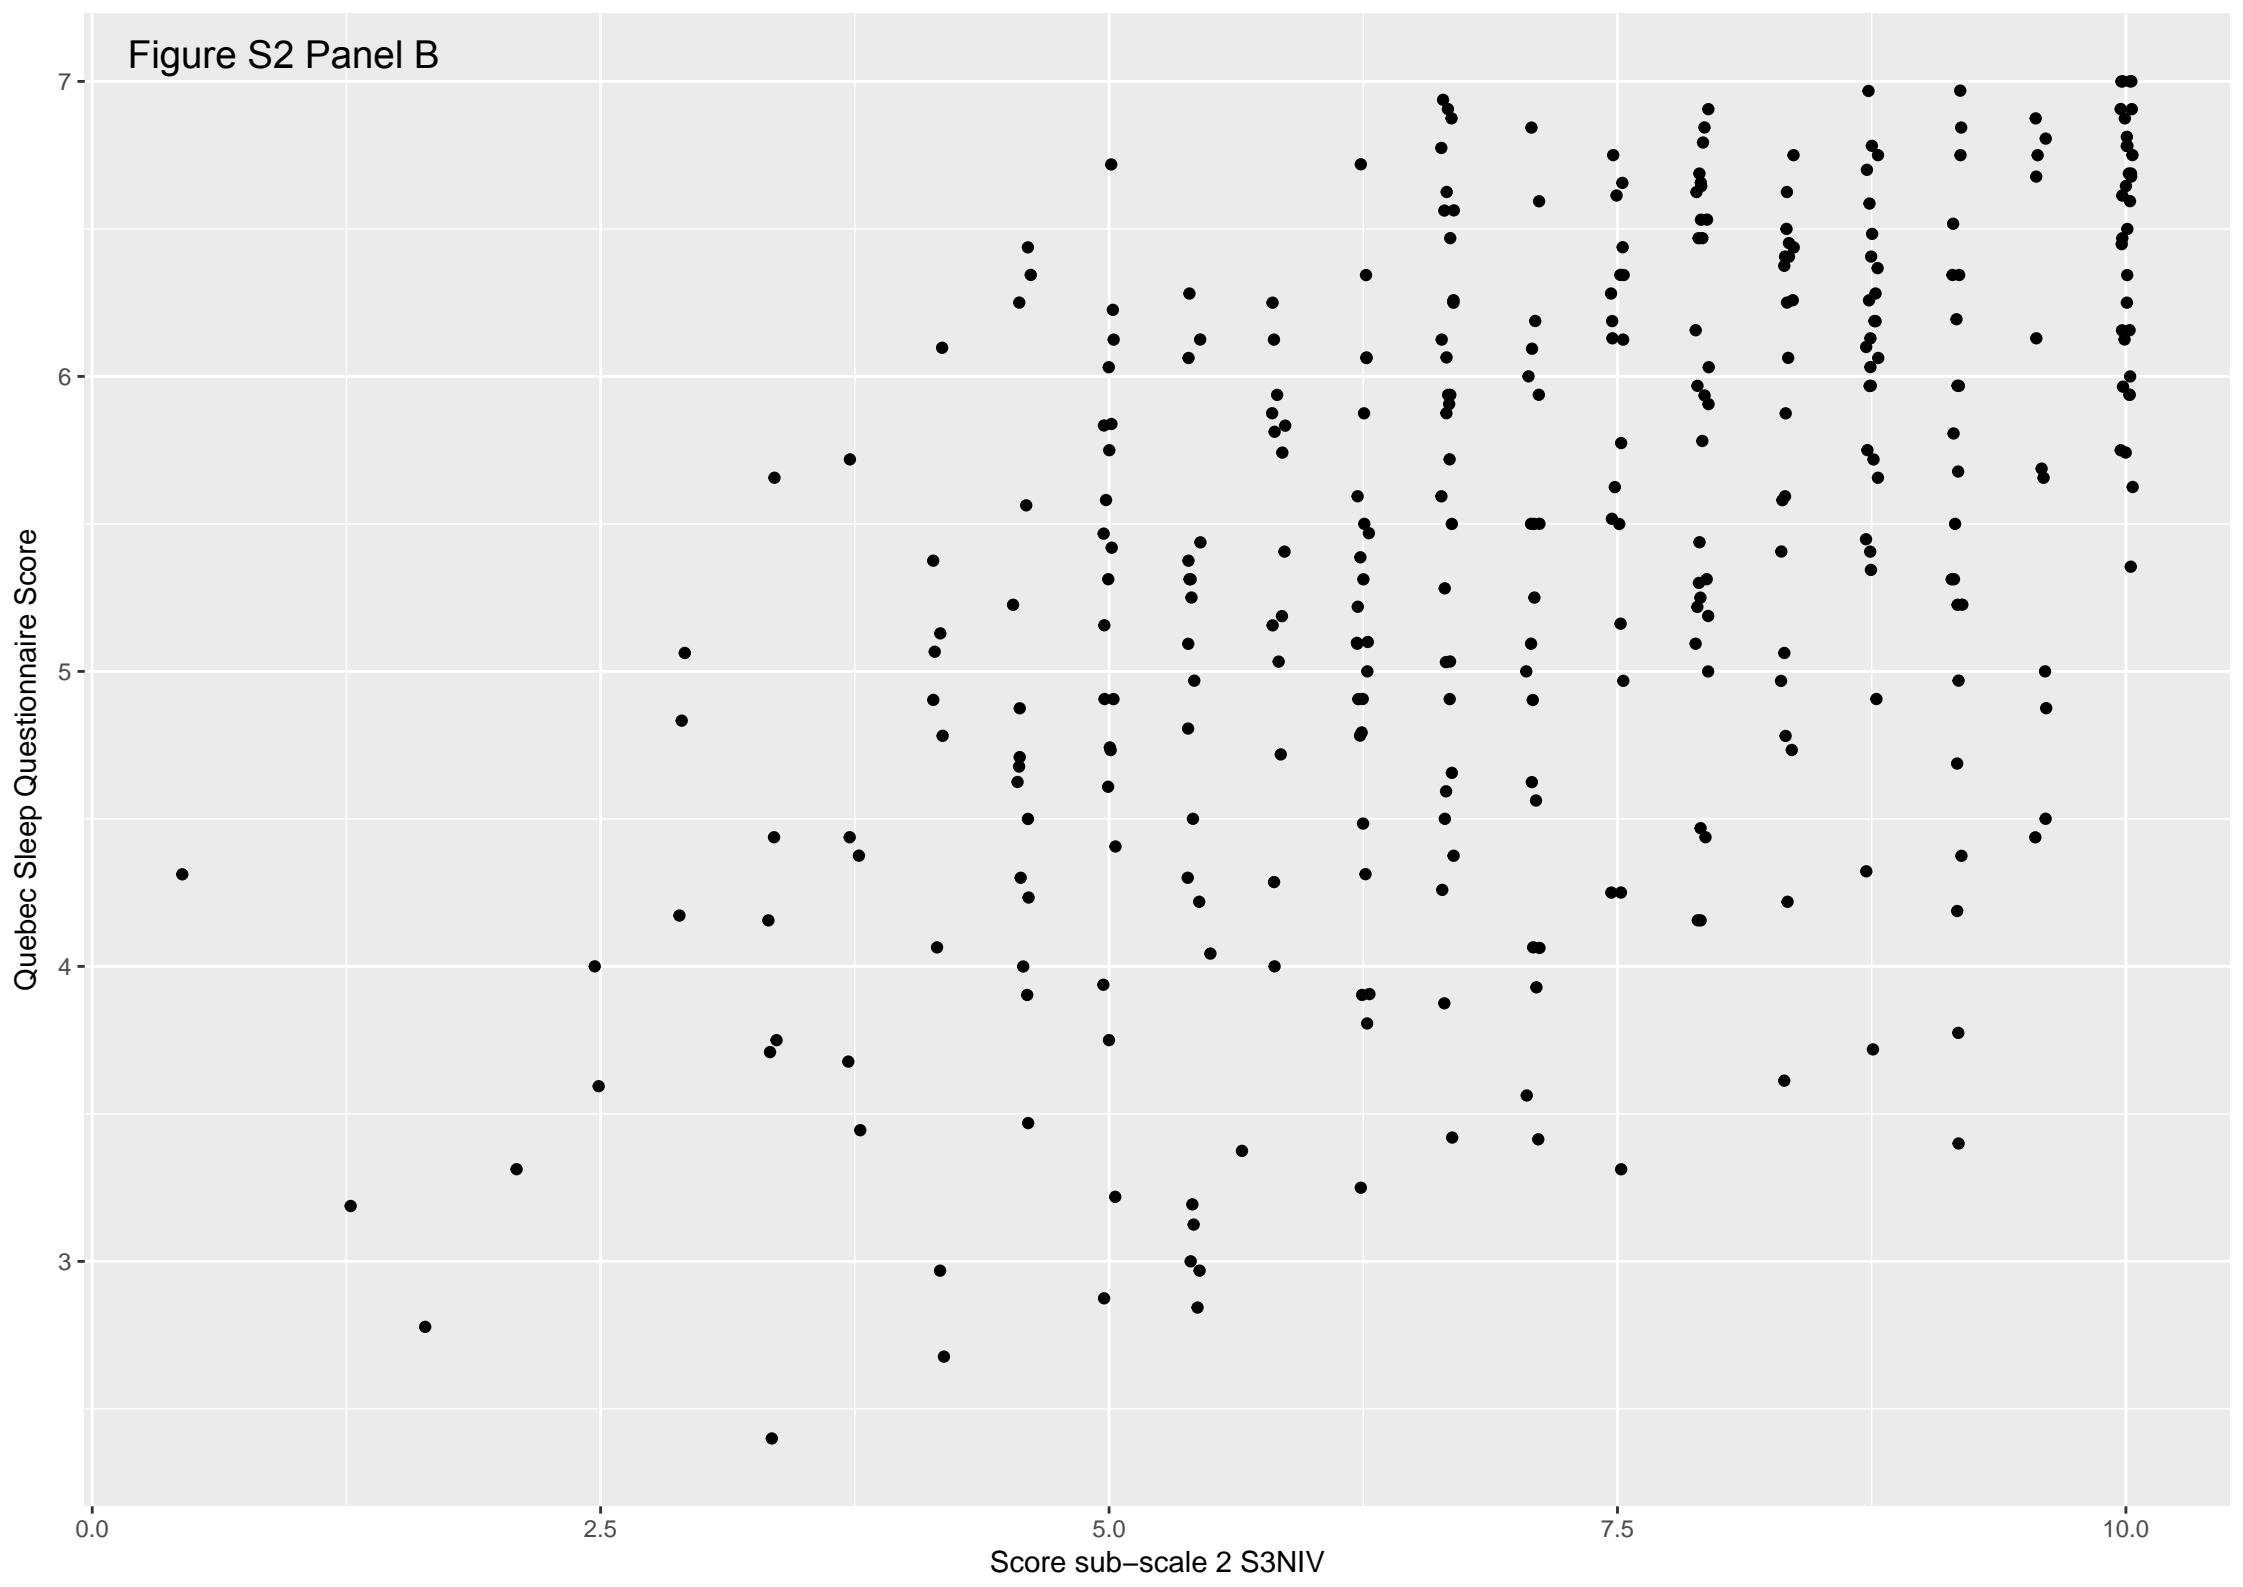

Supplement: inline-supplementary-material-2 [file inline-supplementary-material-2.pdf]
